# Supplementary material
Source: MDPI journal article supplement (https://www.mdpi.com/1099-4300/21/2/195)
Supplement: s1 [file s1]

## Sheet: Hoja1
Chromosome	Chromosome density	signFactor	ChangeFactor
1	8.09062e-06	-0.243716	0.783373
2	5.35528e-06	-0.214327	0.875496
3	5.01387e-06	-0.196503	1.02368
4	5.2284e-06	-0.191222	1.04808
5	4.97683e-06	-0.213105	0.912855
6	5.85148e-06	-0.189696	0.991256
7	5.66674e-06	-0.165114	1.13271
8	4.78551e-06	-0.200769	1.18111
9	5.69629e-06	-0.101952	1.39565
10	5.17083e-06	-0.118673	1.30122
11	9.66885e-06	-0.223305	0.902943
12	8.31509e-06	-0.164402	1.05876
13	2.62863e-06	-0.110956	1.3989
14	7.52158e-06	-0.0965646	1.26482
15	5.97973e-06	-0.124749	1.12945
16	9.00675e-06	-0.157133	1.10641
17	1.52565e-05	-0.232338	0.860155
18	2.62753e-06	-0.0575074	1.63656
19	2.35085e-05	-0.199691	0.917588
20	8.0082e-06	-0.127511	1.35678
21	4.26037e-06	0.113619	1.88877
22	1.00951e-05	-0.0740094	1.16918
X	5.16416e-06	-0.18572	0.937488
