# Supplementary material
Source: MDPI journal article supplement (https://www.mdpi.com/1099-4300/21/2/195)

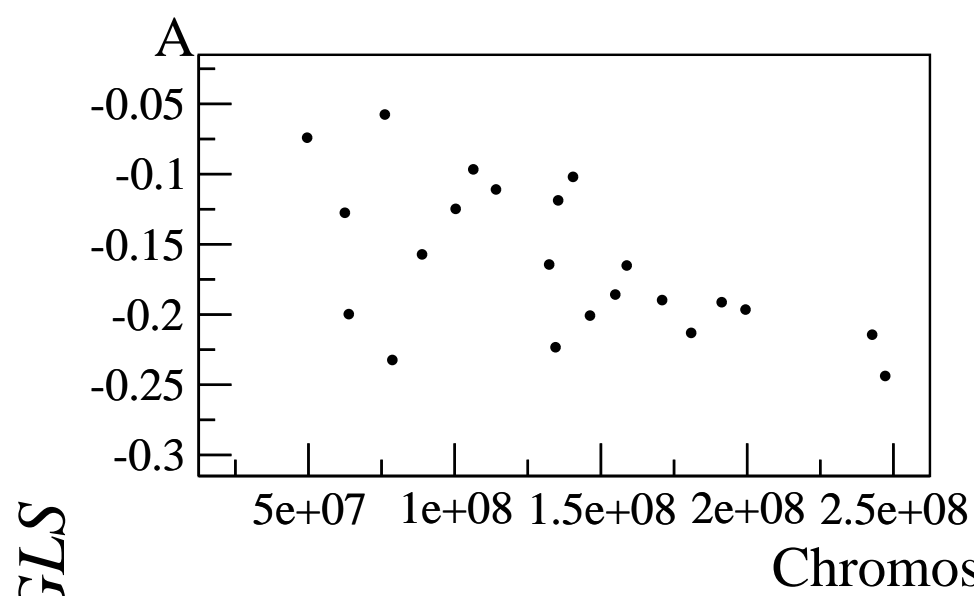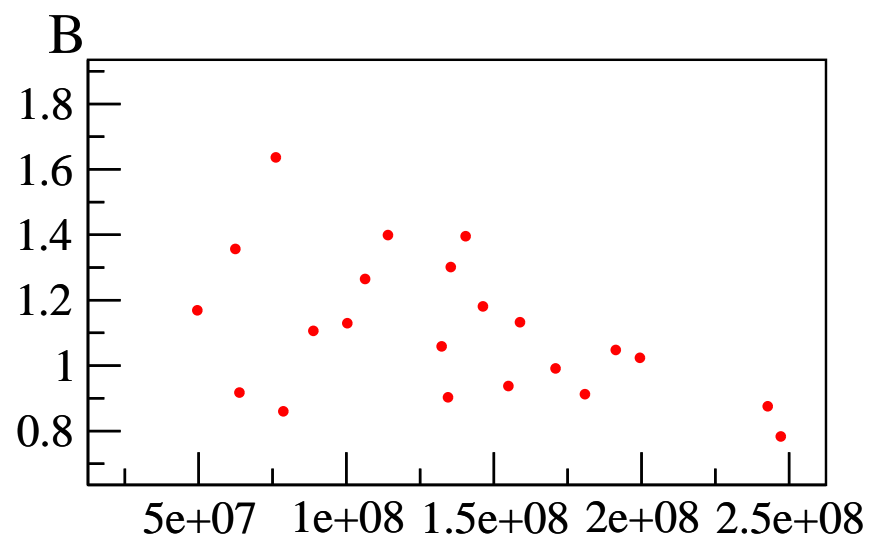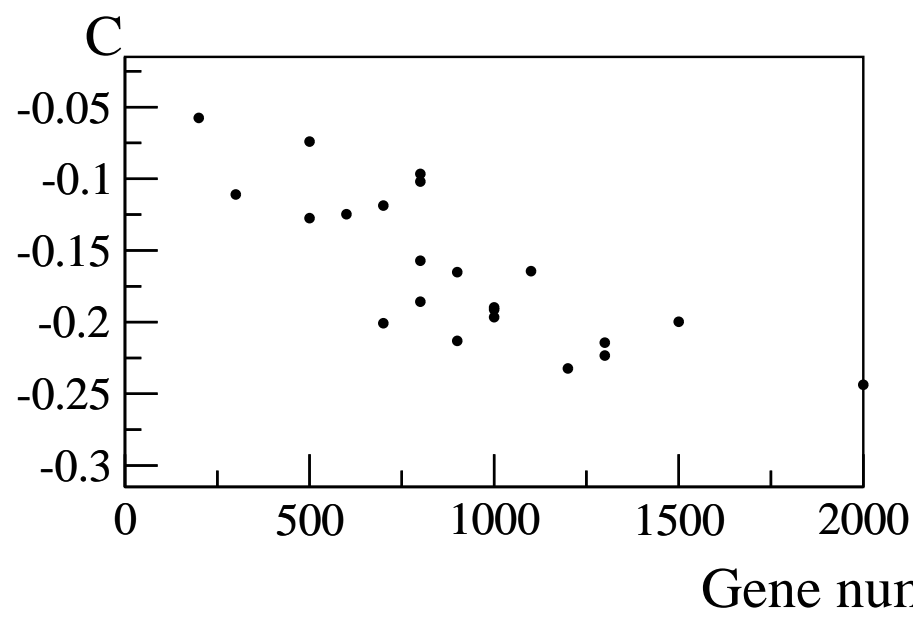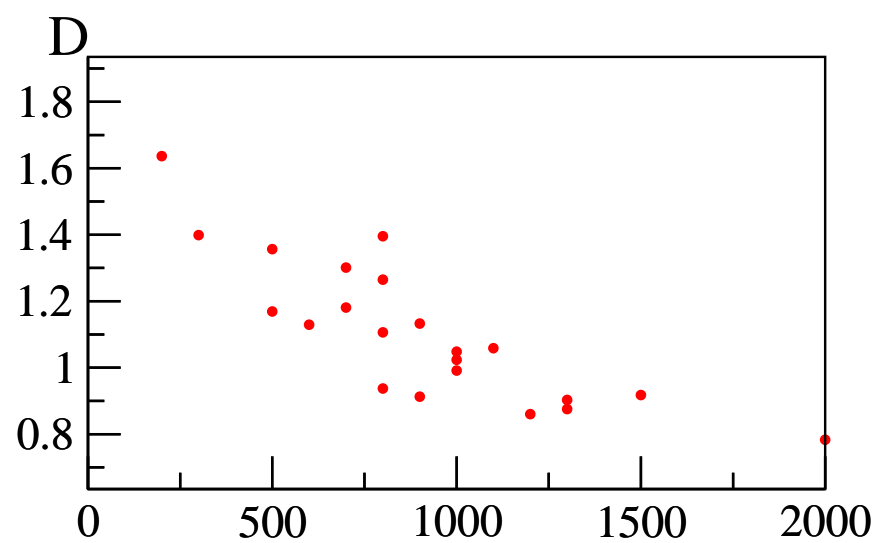

*GLR*

Supplement: s1 [file s1]
